# Supplementary material
Source: PubMed Central journal article supplement (PMC1892955)
Supplement: pnas_0610877104_2.pdf [file pnas_0610877104_2.pdf]

**Table 1. Promoter combinations that would specifically label different neuronal groups in *C. elegans***

| Neuron group*   | Number of neurons | Promoter combination <sup>†</sup> |
|-----------------|-------------------|-----------------------------------|
| ADA             | 2                 | <i>sax-7 + eat-4</i>              |
| ADE             | 2                 | <i>cat-2 + gpa-14</i>             |
| ADF             | 2                 | <i>gpa-10 + gpa-13</i>            |
| ADL             | 2                 | <i>ver-2</i>                      |
| AFD             | 2                 | <i>gcy-8</i>                      |
| AIA             | 2                 |                                   |
| AIB             | 2                 | <i>odr-2 (2b) + mgl-2</i>         |
| AIM             | 2                 | <i>zig-3 + cat-1</i>              |
| AIN             | 2                 |                                   |
| AIY             | 2                 | <i>ttx-3 + ncs-1</i>              |
| AIZ             | 2                 | <i>odr-2(2b) + kin-29</i>         |
| ALA             | 1                 | <i>ceh-14 + ver-3</i>             |
| ALM/PLM/AVM/PVM | 6                 | <i>mec-4</i>                      |
| ALN/PLN         | 4                 | <i>lad-2 + unc-53</i>             |
| AQR/PQR         | 2                 | <i>tax-2 + gcy-36</i>             |
| ASn             | 11                | <i>hmr-1 + unc-53</i>             |
| ASE             | 2                 | <i>gcy-5</i>                      |
| ASG             | 2                 | <i>tax-2 + lim-6</i>              |
| ASH             | 2                 | <i>sra-6 + nhr-79</i>             |
| ASI             | 2                 | <i>gpa-4</i>                      |
| ASJ             | 2                 | <i>tax-2 + gpa-9</i>              |
| ASK             | 2                 | <i>sra-7</i>                      |
| AUA             | 2                 | <i>eat-4 + ceh-6</i>              |
| AVA             | 2                 | <i>gpa-14 + flp-18</i>            |
| AVB             | 2                 | <i>glr-1 + sra-11</i>             |
| AVD             | 2                 | <i>nmr-1 + cfi-1</i>              |
| AVE             | 2                 | <i>opt-3 + flp-1</i>              |
| AVF             | 2                 |                                   |
| AVG             | 1                 | <i>odr-2 (2b) + nmr-1</i>         |
| AVH             | 2                 | <i>ceh-6 + ggr-1</i>              |
| AVJ             | 2                 |                                   |
| AVK             | 2                 | <i>flp-1</i>                      |
| AVL             | 1                 |                                   |
| AWA             | 2                 | <i>odr-7</i>                      |
| AWB             | 2                 | <i>str-1</i>                      |
| AWC             | 2                 | <i>odr-1 + tax-4</i>              |
| BAG             | 2                 | <i>gcy-33</i>                     |
| BDU             | 2                 | <i>ceh-14 + glr-8</i>             |
| CAN             | 2                 | <i>ceh-23 + ggr-2</i>             |
| CEP             | 4                 | <i>ace-1 + UL#AL129</i>           |
| DAn             | 9                 | <i>unc-53 + unc-4</i>             |

| Neuron group* | Number of neurons | Promoter combination <sup>†</sup> |
|---------------|-------------------|-----------------------------------|
| DBn           | 7                 | <i>vab-7 + unc-5</i>              |
| DDn           | 6                 | <i>unc-25 + ggr-2</i>             |
| DVA           | 1                 | <i>zig-5 + nmr-1</i>              |
| DVB           | 1                 | <i>unc-25 + egl-36</i>            |
| DVC           | 1                 | <i>ceh-14 + glr-1</i>             |
| FLP           | 2                 | <i>mec-3 + egl-44</i>             |
| <b>GLR</b>    | <b>6</b>          |                                   |
| HSN           | 2                 | <i>unc-53 + unc-51</i>            |
| IL1           | 6                 | <i>deg-3 + osm-6</i>              |
| IL2           | 6                 | <i>oig-1 + osm-3</i>              |
| LUA           | 2                 | <i>glr-5 + npl-13</i>             |
| OLL           | 2                 | <i>ace-1 + eat-4</i>              |
| <b>OLQ</b>    | <b>4</b>          | <i>ocr-4</i>                      |
| PDA           | 1                 | <i>dop-2 + itr-1</i>              |
| PDB           | 1                 | <i>kal-1 + dbl-1</i>              |
| PDE           | 2                 | <i>gpa-16 + cat-2</i>             |
| <b>PHA</b>    | <b>2</b>          | <i>gcy-12</i>                     |
| PHB           | 2                 | <i>gpa-9 + osm-10</i>             |
| PHC           | 2                 | <i>dop-1 + ceh-14</i>             |
| PVC           | 2                 | <i>egl-36 + deg-3</i>             |
| PVD           | 2                 | <i>eat-4 + pkc-1</i>              |
| PVN           | 2                 |                                   |
| PVP           | 2                 | <i>odr-2(2b) + unc-53</i>         |
| PVQ           | 2                 | <i>glr-1 + gpa-9</i>              |
| PVR           | 1                 | <i>ceh-14 + eat-4</i>             |
| <b>PVT</b>    | <b>1</b>          | <i>oig-3</i>                      |
| <b>PVW</b>    | <b>2</b>          |                                   |
| <b>RIA</b>    | <b>2</b>          | <i>glr-3</i>                      |
| RIB           | 2                 | <i>mgl-1 + ser-4</i>              |
| RIC           | 2                 |                                   |
| RID           | 1                 | <i>dop-2 + zig-5</i>              |
| RIF           | 2                 | <i>odr-2(2b) + glr-4</i>          |
| RIG           | 2                 | <i>glr-1 + flp-18</i>             |
| RIH           | 1                 | <i>unc-5 + cat-1</i>              |
| RIM           | 2                 | <i>dop-1 + glr-1</i>              |
| <b>RIP</b>    | <b>2</b>          |                                   |
| <b>RIR</b>    | <b>1</b>          |                                   |
| RIS           | 1                 | <i>ser-4 + unc-25</i>             |
| RIV           | 2                 | <i>zig-5 + odr-2</i>              |
| <b>RMD</b>    | <b>6</b>          | <i>rig-5</i>                      |
| RME           | 4                 | <i>lim-4 + unc-47</i>             |
| <b>RMF</b>    | <b>2</b>          |                                   |
| RMG           | 2                 | <i>avr-15 + goa-1</i>             |
| <b>RMH</b>    | <b>2</b>          |                                   |

| Neuron group* | Number of neurons | Promoter combination <sup>†</sup> |
|---------------|-------------------|-----------------------------------|
| SAA           | 4                 | <i>lad-2 + unc-42</i>             |
| SAB           | 3                 | <i>unc-4 + glr-4</i>              |
| SDQ           | 2                 | <i>pkc-1 + gcy-35</i>             |
| SIA           | 4                 | <i>lim-4 + sro-1</i>              |
| SIB           | 4                 | <i>dop-2 + ceh-24</i>             |
| <b>SMB</b>    | <b>4</b>          |                                   |
| SMD           | 4                 | <i>lad-2 + lim-4</i>              |
| <b>URA</b>    | <b>4</b>          | <i>lim-7</i>                      |
| URB           | 2                 | <i>glr-5 + glr-8</i>              |
| URX           | 2                 | <i>gpa-8 + pef-1</i>              |
| URY           | 4                 | <i>glr-4 + tol-1</i>              |
| <b>VAn</b>    | <b>12</b>         |                                   |
| VBn           | 11                | <i>pag-3 + acr-5</i>              |
| VCn           | 6                 | <i>unc-4 + cdh-3</i>              |
| VDn           | 13                | <i>unc-55 + unc-14</i>            |
| <b>M1</b>     | <b>1</b>          |                                   |
| M2            | 1                 | <i>tbx-2 + zig-4</i>              |
| M3            | 1                 | <i>flp-18 + ceh-2</i>             |
| <b>M4</b>     | <b>1</b>          | <i>ceh-28</i>                     |
| M5            | 1                 | <i>tbx-2 + kal-1</i>              |
| I1            | 1                 | <i>glr-8 + odr-1</i>              |
| I2            | 1                 | <i>glr-8 + npl-8</i>              |
| <b>I3</b>     | <b>1</b>          |                                   |
| <b>I4</b>     | <b>1</b>          |                                   |
| <b>I5</b>     | <b>1</b>          |                                   |
| <b>I6</b>     | <b>1</b>          |                                   |
| NSM           | 1                 | <i>cat-1 + glr-7</i>              |
| MI            | 1                 | <i>ahr-1 + glr-7</i>              |
| <b>MC</b>     | <b>1</b>          |                                   |
| Total         | 302               |                                   |

\*Neuron groups are based on the classification by White et al.

<sup>†</sup>Neuron groups that can be labeled by single promoter are indicated in blue, by a combination of two promoters are in black and those that cannot be labeled by two-promoter combination are indicated in red. The data on promoter combinations are extracted from *C. elegans* expression databases

([http://wormbase.org/db/searches/expr\\_search](http://wormbase.org/db/searches/expr_search)) and

(<http://chinook.uoregon.edu/promoters.html>).

1. White JG, Southgate E, Thomson JN, Brenner S (1986) *Philos Trans R Soc London B* 341:1-340.
